# Supplementary material
Source: MDPI journal article supplement (https://www.mdpi.com/2071-1050/13/16/9114)

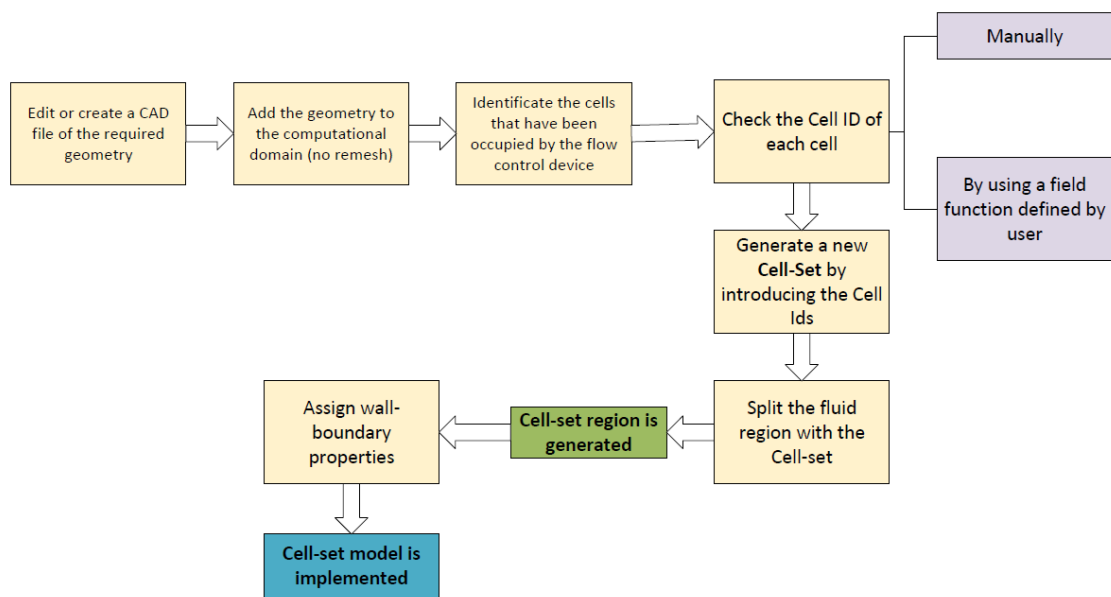

**Figure S1.** Cell-set model implementation flowchart.

Supplement: s1 [file s1]
